# Supplementary material for: Stress and viral insults do not trigger E200K PrP conversion in human cerebral organoids
Source: PubMed Central journal article supplement (PMC9612459; doi:10.1371/journal.pone.0277051), 2022-10-27

## S2 Fig

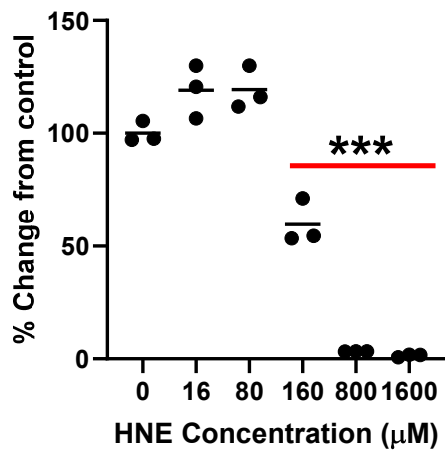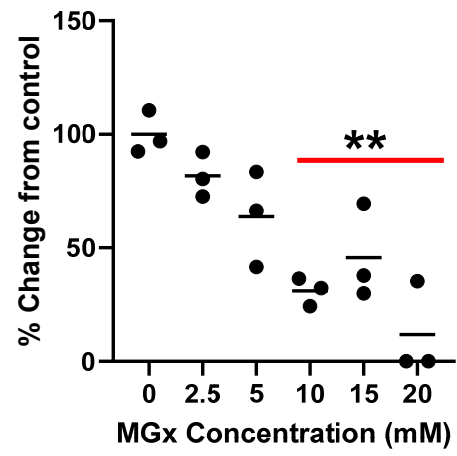

Supplement: pone.0277051.s002.pdf [file pone.0277051.s002.pdf]
