# Supplementary material for: Stress and viral insults do not trigger E200K PrP conversion in human cerebral organoids
Source: PubMed Central journal article supplement (PMC9612459; doi:10.1371/journal.pone.0277051), 2022-10-27

### S3 Fig

#### 200E/E

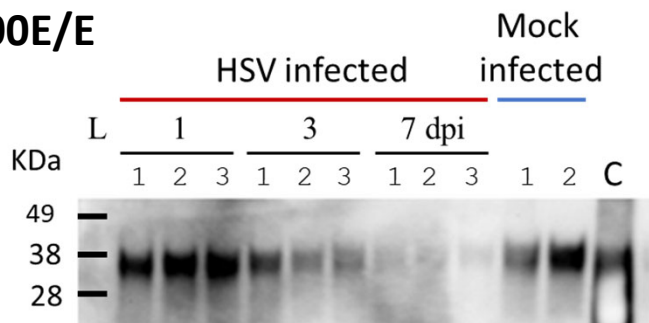

#### 200E/K

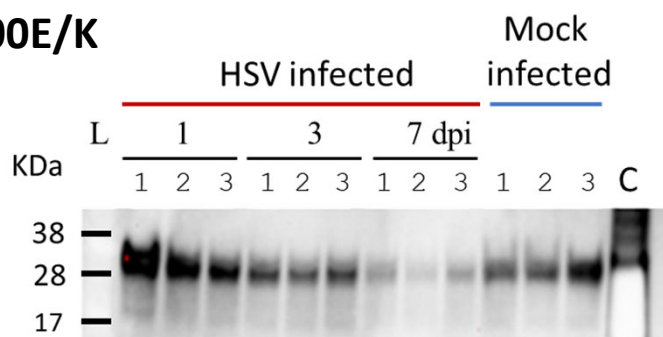

#### 200K/K

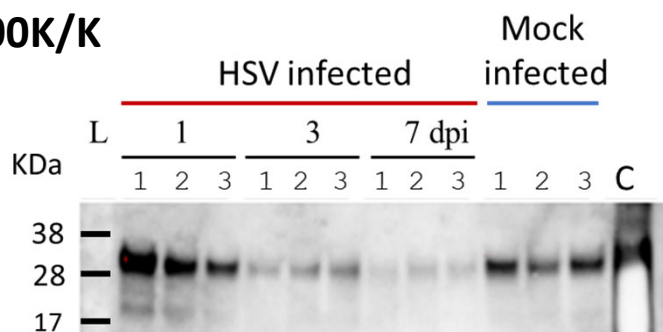

#### Uncropped images

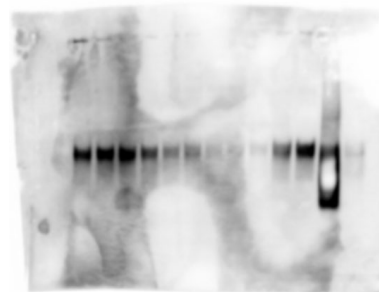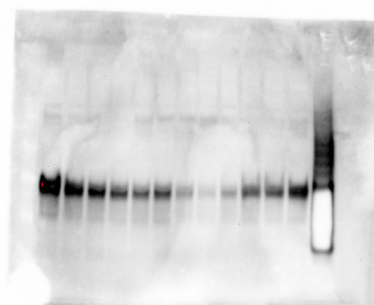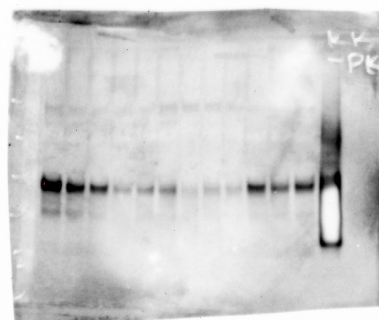

Supplement: pone.0277051.s003.pdf [file pone.0277051.s003.pdf]
