# Supplementary material for: Stress and viral insults do not trigger E200K PrP conversion in human cerebral organoids
Source: PubMed Central journal article supplement (PMC9612459; doi:10.1371/journal.pone.0277051), 2022-10-27
Supplement: pone.0277051.s008.pdf [file pone.0277051.s008.pdf]

### Panel shown in Figure 2A

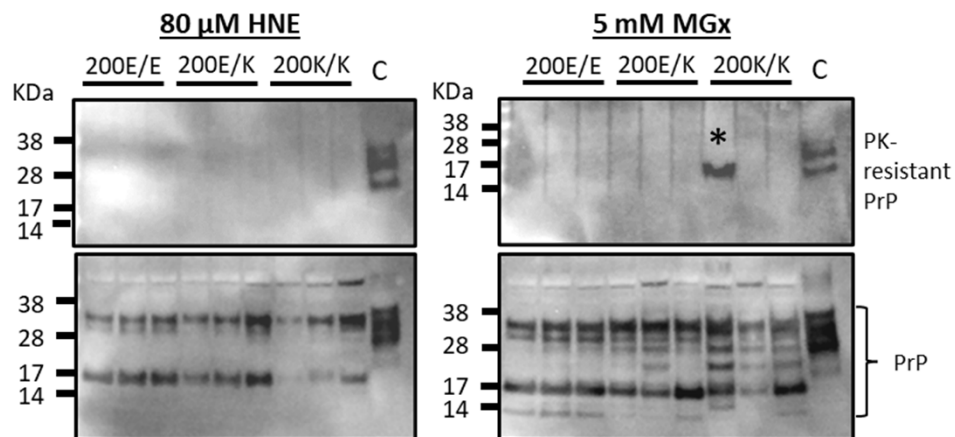

Raw blot images spatially corresponding with cropped blots above

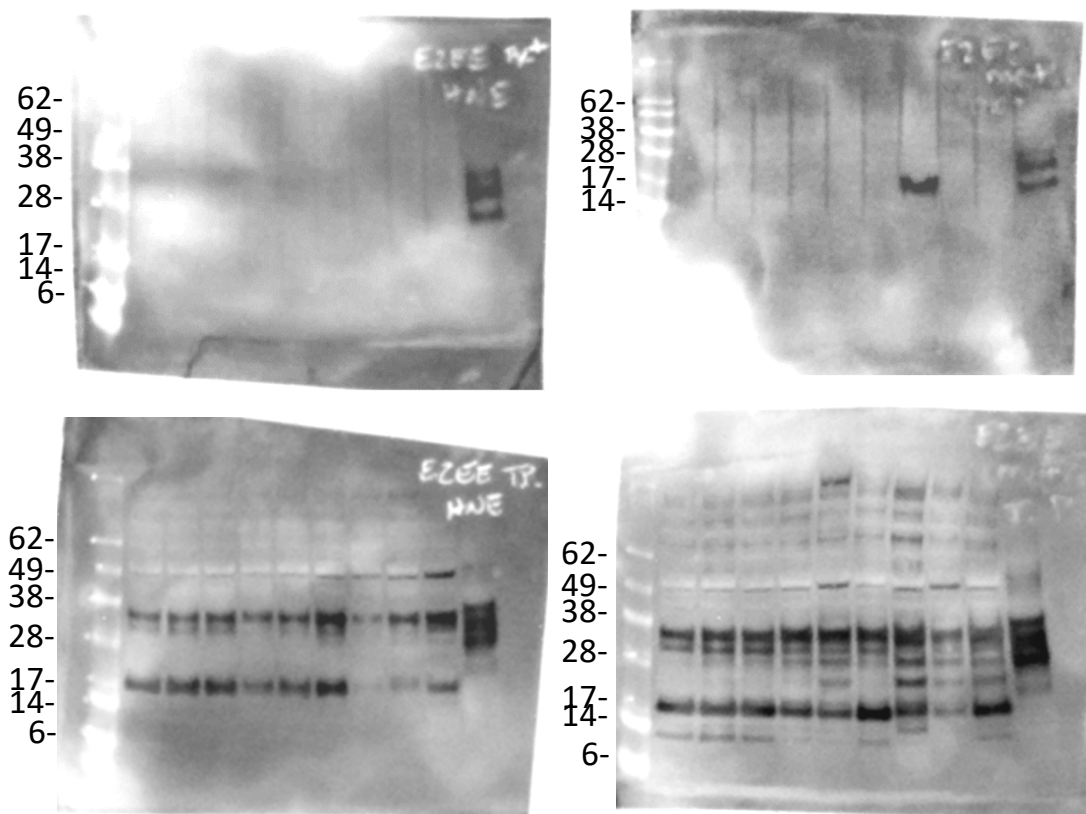

Ladder = see blue plus 2 (Invitrogen)

Panel shown in Figure 3B

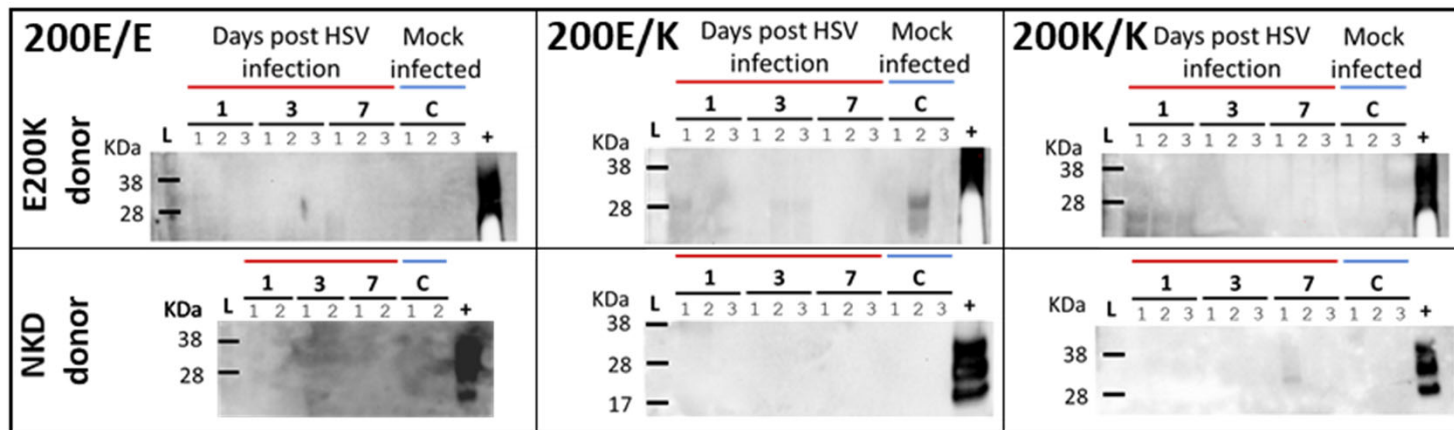

Raw blot images spatially corresponding with cropped blots above

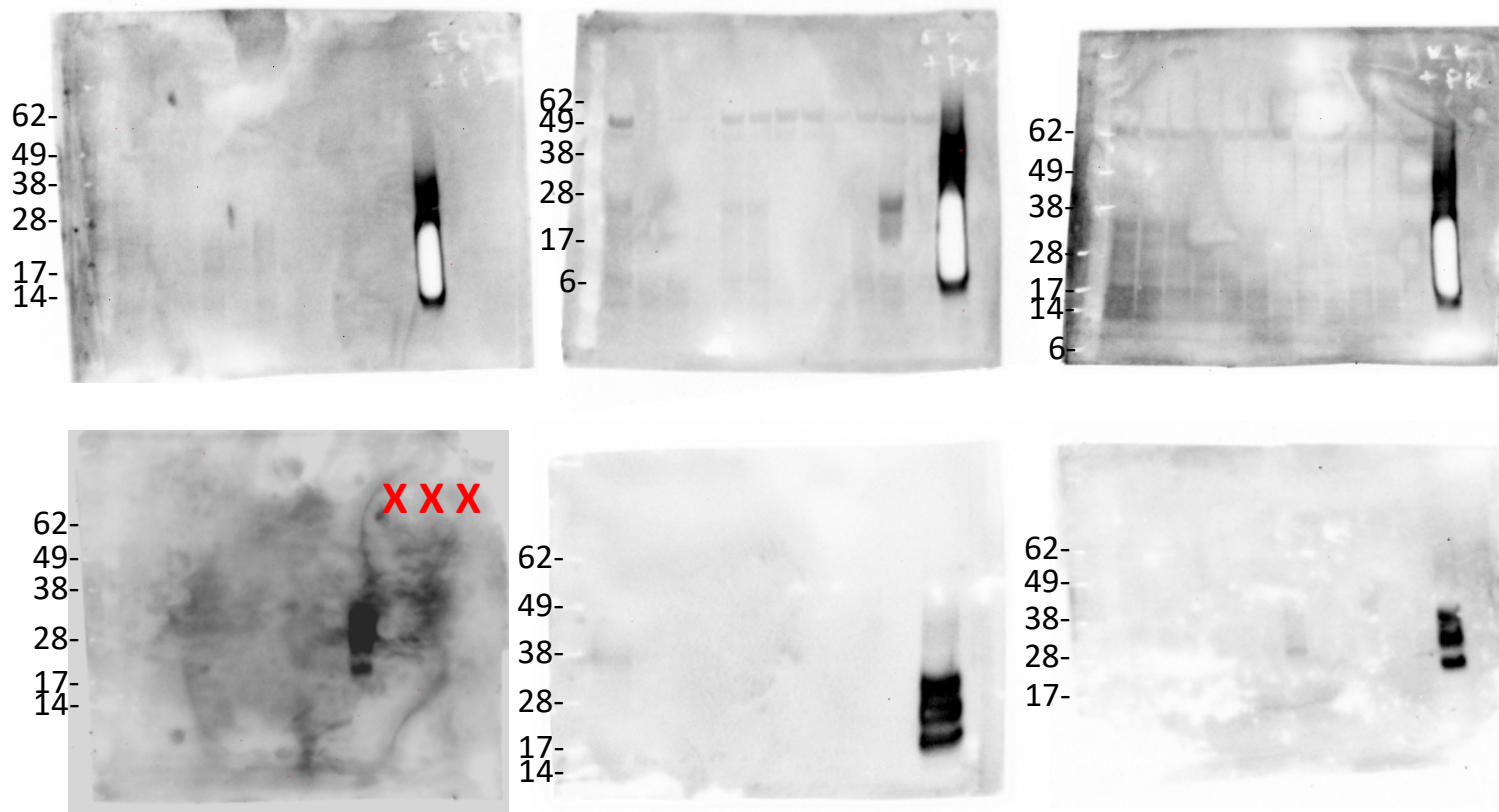

X = lane not used in current manuscript. Ladder = see blue plus 2 (Invitrogen)

**Panels shown in Figure 4 B & E**

Raw blot images spatially corresponding with cropped blots above

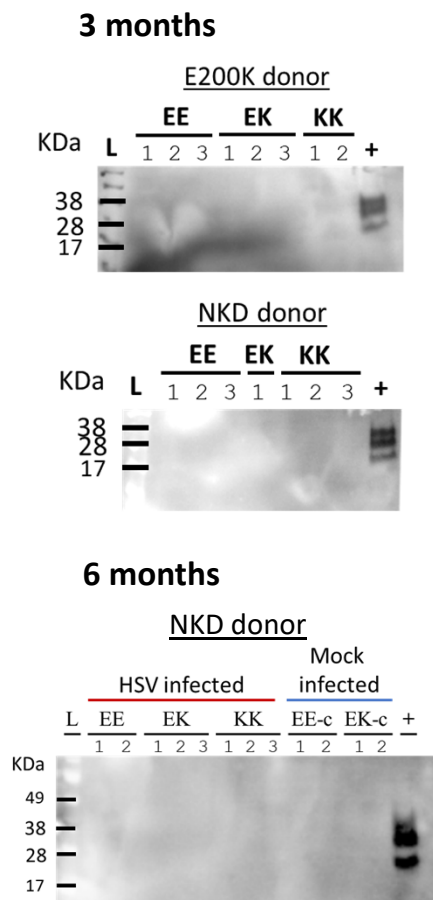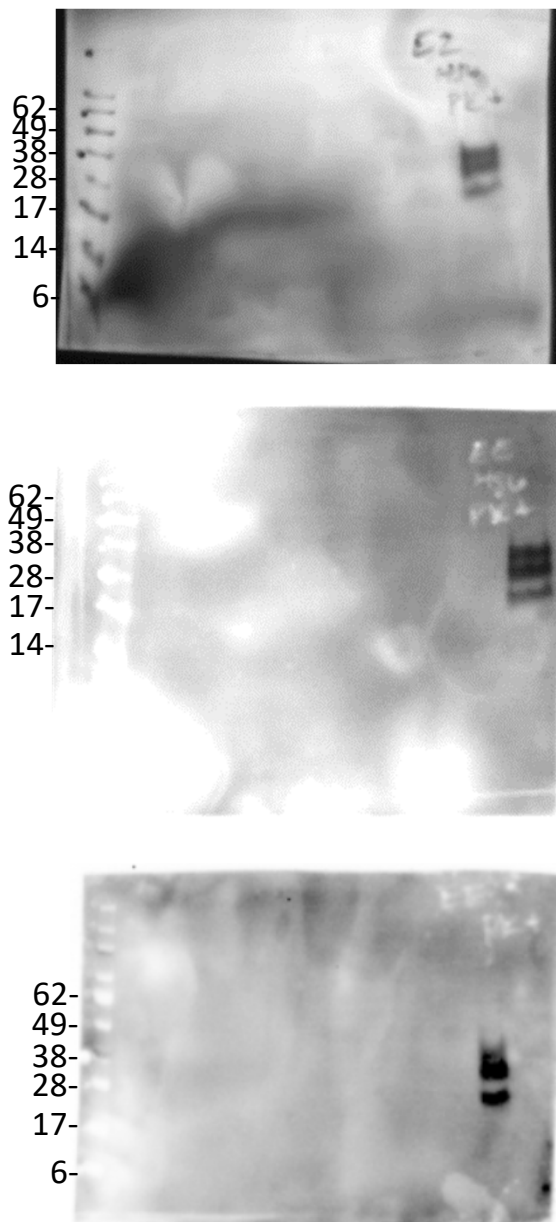

Ladder = see blue plus 2 (Invitrogen)
